**ACID–BASE REGULATION, BRANCHIAL TRANSFERS AND  
RENAL OUTPUT IN A MARINE TELEOST FISH (THE LONG-  
HORNED SCULPIN *MYOXOCEPHALUS OCTODECIMSPINOSUS*)  
DURING EXPOSURE TO LOW SALINITIES**

JAMES B. CLAIBORNE, JULIE S. WALTON  
AND DANA COMPTON-McCULLOUGH

*Department of Biology, Georgia Southern University, Statesboro, GA 30460, USA and  
The Mount Desert Island Biological Laboratory, Salsbury Cove, ME 04672, USA*

*Accepted 24 March 1994*

**Summary**

A number of studies have implied a linkage between acid–base and ion exchanges in both freshwater and seawater fish, although little is known about the branchial and renal acid–base transfers involved as the animals move between different salinities. To investigate the role of these transfers in a marine teleost fish as it is exposed to a dilute environment, we measured plasma acid–base values and net movements from fish to water of  $\text{NH}_4^+$ ,  $\text{HCO}_3^-$  and  $\text{H}^+$  in long-horned sculpin (*Myoxocephalus octodecimspinosus*) placed in 100%, 20%, 8% or 4% sea water for 24–48h. Renal excretion of  $\text{H}^+$  was also monitored in fish exposed to 4% sea water.

Sculpin proved to be somewhat euryhaline for they were able to maintain plasma ion and acid–base transfers in hypo-osmotic (20%) sea water, but could not tolerate greater dilutions for more than several days. Plasma pH and carbon dioxide concentration ( $C_{\text{CO}_2}$ ) increased in the 20% and 8% dilution groups, with  $C_{\text{CO}_2}$  nearly doubling (control,  $4.56\text{mmol l}^{-1}$ ; 8% group,  $8.56\text{mmol l}^{-1}$ ) as a result of a combined increase in the partial pressure of plasma  $\text{CO}_2$  ( $P_{\text{CO}_2}$ ) and  $[\text{HCO}_3^-]$ . During a 44–46h exposure,  $\text{HCO}_3^-$  transfers increased progressively in the most dilute water, with animals in the 8% and 4% groups exhibiting a net  $\text{H}^+$  loss that was smaller than that of seawater fish (control,  $5.1\text{mmol kg}^{-1}$ ; 8%,  $0.9\text{mmol kg}^{-1}$ ; 4%,  $-2.9\text{mmol kg}^{-1}$ ). Animals exposed to 4% sea water for 24h and then returned to normal sea water had a variable plasma pH, an elevated  $C_{\text{CO}_2}$  and a net efflux of  $\text{H}^+$  that effectively stopped (control,  $0.10\text{mmol kg}^{-1}\text{ h}^{-1}$ ; 4%,  $0.02\text{mmol kg}^{-1}\text{ h}^{-1}$ ; seawater recovery,  $0.20\text{mmol kg}^{-1}\text{ h}^{-1}$ ) during the low-salinity period. Renal acid excretion remained relatively constant throughout the experiment but only made up a significant portion (approximately 40%) of the total acid transfers during the 4% dilution period (control rate approximately  $3\text{ }\mu\text{mol kg}^{-1}\text{ h}^{-1}$ ; 3% of branchial rate).

We postulate that the increase in plasma  $C_{\text{CO}_2}$  during exposure to low salinity may be due to mobilization of base from the intracellular bone compartment. The decrease in external salinity could induce base loss by alteration of gill ion exchanges ( $\text{Na}^+/\text{H}^+$ ,

Key words: ammonia, pH balance,  $\text{H}^+$  excretion, salinity, stenohaline, euryhaline, *Myoxocephalus octodecimspinosus*.

$\text{Cl}^-/\text{HCO}_3^-$ ) and/or changes in branchial  $\text{HCO}_3^-$  permeability. For the first time, we have shown that the effects of a dilute environment on acid–base transfers may be an important limitation to the survival of a euryhaline species in brackish or fresh water.

### Introduction

When a marine euryhaline teleost is exposed to lower ambient salinities, several adaptive modifications in ion- and osmoregulatory processes are required. As the external milieu is diluted past the iso-osmotic point, the animal must begin to excrete a more dilute urine (Hickman and Trump, 1969; Lahlou *et al.* 1969) and limit the osmotic influx of water (Isaia *et al.* 1979). Internal salt conservation must also take place when the fish is in the dilute environment, and this is assisted by decreases in unidirectional efflux (Lahlou and Sawyer, 1969; see review by Evans, 1984) resulting from a reduction in branchial permeability (Zadunaisky, 1984). Long-term adaptations are probably driven by increased levels of circulating prolactin (reviewed by Loretz and Bern, 1982). Likewise, salt extrusion by branchial chloride cells (Silva *et al.* 1977) must be reduced in fresh water, and the net branchial uptake of NaCl must begin. Evidence for the uptake of NaCl by  $\text{Na}^+/\text{NH}_4^+$ ,  $\text{Na}^+/\text{H}^+$  and  $\text{Cl}^-/\text{HCO}_3^-$  exchange mechanisms has been found in a number of freshwater species (Maetz and Garcia-Romeu, 1964; Cameron, 1976; Claiborne and Heisler, 1984; Wood *et al.* 1984; Iwama and Heisler, 1991). Some seawater and euryhaline species may also possess the necessary freshwater gill exchange systems even when adapted to sea water (Evans, 1977; Claiborne *et al.* 1982; McDonald *et al.* 1982; reviewed by Evans, 1993) as these exchanges are thought to assist the animal in maintaining acid–base balance (Cameron, 1976; Claiborne and Evans, 1988). That seawater species excrete acid–base equivalents in exchange for the uptake of NaCl could be an indication of the importance of maintaining acid–base regulation (even though these exchanges would exacerbate the ionic load already faced by the hypo-osmotic fish; Evans, 1980).

If the immediate need to regulate internal pH can induce ion fluxes that amplify ionic/osmotic stresses, the converse should also be true: the lack of appropriate counter-exchange ions may inhibit acid–base adjustments. Indeed, compensatory  $\text{H}^+$  excretion (or  $\text{HCO}_3^-$  uptake) during external hypercapnia in the marine gulf toadfish is approximately six times faster than in the freshwater carp (Evans, 1982; Claiborne and Heisler, 1986). Tang *et al.* (1989) showed that seawater-adapted rainbow trout could excrete an acid load (induced by exercise) approximately five times faster than freshwater-adapted conspecifics. Likewise, Iwama and Heisler (1991) recently demonstrated that recovery of plasma pH during hypercapnia in the trout could be enhanced when fish were adapted to higher external water salinities. The time course of hypercapnic compensation in the freshwater trout is also much longer (3 days *versus* 22h) in animals exposed to very low ambient ion concentrations (Janssen and Randall, 1975; Eddy *et al.* 1977; Heisler, 1982).

Several studies have explored the effects of salinity changes on internal acid–base balance and ion-regulatory status (Milne and Randall, 1976; Bath and Eddy, 1979). Perry and Heming (1981) observed that, following transfer of freshwater trout (*Oncorhynchus mykiss*) to sea water, blood pH was increased significantly because of an elevation in

plasma [ $\text{HCO}_3^-$ ]. They suggested that this was due to an increase in the coupled influx of  $\text{HCO}_3^-$  for the excretion of  $\text{Cl}^-$  (an adaptive ion-regulatory maneuver for a fish entering sea water). Likewise, seawater-adapted salmon (*Salmo salar*) and flounder (*Platichthys flesus*) exhibit long term plasma acid–base and ventilatory changes when exposed to fresh water (Maxime *et al.* 1990; Nonnotte and Truchot, 1990). The inherent relationship between acid–base and ion movements is therefore found in animals exposed to either hypo- or hyperionic conditions. Little is known about the acid–base transfers between the fish and the water that may occur during these salinity changes.

A significant capacity for renal acid–base excretion following acid–base disturbances has also been shown in several species of freshwater teleost (McDonald and Wood, 1981; Wheatly *et al.* 1984). In the freshwater catfish, renal output accounts for 16–18% of the total measured transfer (Cameron and Kormanik, 1982). Less is known about the role of the kidney of seawater teleosts in acid–base regulation. In contrast to freshwater fish, the kidneys of marine animals are generally thought to be involved with the conservation of water and the excretion of divalent cations (for a review, see Sullivan, 1986). Hodler *et al.* (1955) suggested that the pH of urine in marine teleosts is fixed at 5.8, but Hickman and Trump (1969) demonstrated that urine pH (in the southern flounder) can range from 5.68 to 8.24. McDonald *et al.* (1982) found little involvement of the kidney during recovery from acid infusion in the seawater lemon sole (*Parophrys vetulus*). In contrast, Maren *et al.* (1992) have recently shown a role for limited net  $\text{H}^+$  excretion by the kidney (28% of total infused acid load) in the marine long-horned sculpin and that the rate of transfer is not dependent on renal carbonic anhydrase. It is likely, therefore, that, when marine fish are exposed to lower ambient salinities, both branchial and renal acid–base regulation are affected. It was the objective of the present study to examine the effects of acute exposure to hypo-osmotic salinities on acid–base regulation, branchial exchanges and renal excretion in a stenohaline marine teleost, the long-horned sculpin.

### Materials and methods

Long-horned sculpin (*Myoxocephalus octodecimspinosus* Mitchill) were collected by a commercial fisherman in Frenchman Bay, Maine USA. They were maintained in running seawater tanks at 13–15°C for 2–5 days before the experiment began. Fish were anesthetized with tricaine methane sulfonate (MS-222, 1:10000), placed in a moist tray and cannulated through a branchial artery according to the methods of Claiborne and Evans (1988). Animals were placed in darkened 2.0–2.5l acrylic boxes containing fresh running sea water (14–16°C) and allowed to recover from anesthesia for 12–36h. During a subsequent control flux period of 10–12h, the chamber was closed and the sea water within the box was continuously aerated. When a dilution experiment was to begin, control blood samples (250–300  $\mu\text{l}$ ) were collected and the chamber was then flushed several times with water of the desired salinity and finally filled with this water. This change was completed within 3–5min. External concentrations tested were: 20, 8 or 4% of the normal seawater concentration (measured as [ $\text{Cl}^-$ ]; natural sea water contained approximately  $500\text{mmol l}^{-1} \text{Cl}^-$ ). All dilutions were hypo-osmotic to the animals: ambient [ $\text{Cl}^-$ ] in the three solutions was approximately 62.5, 25 and 12.5% of control

plasma  $[\text{Cl}^-]$  (typically  $160\text{mmol l}^{-1}$  in seawater-adapted animals). A control group was allowed to remain in 100% sea water for the length of the experiment (normally 48–72h). Preliminary studies had shown that acute exposure to the 4 and 8% dilutions for 48–60 h was often lethal, so these series were usually limited to 24 and 36h, respectively. In some experiments, fish were exposed to 4% water for 24h, followed by a 24h recovery period in sea water.

During the period of exposure to low salinity (LSE), plasma pH ( $\text{pH}_{\text{pl}}$ ), total  $\text{CO}_2$  ( $C_{\text{CO}_2}$ ) and plasma  $[\text{Cl}^-]$  ( $[\text{Cl}^-]_{\text{pl}}$ ) were regularly measured. Likewise, 20ml water samples were collected for the subsequent analysis of total ammonia ( $T_{\text{amm}}$ ) and titratable base. Water  $[\text{Cl}^-]$  was periodically monitored during the experiment and the chambers were intermittently flushed with water (every 8–12h) to maintain the desired concentration and to prevent the accumulation of external ammonia.

$\text{pH}_{\text{pl}}$  was measured in a small-volume pH electrode (30–50  $\mu\text{l}$ ; Instrumentation Laboratory Inc.) connected to an Orion Research EA 920 expandable ion analyzer. The electrode was mounted in a custom-built acrylic water jacket, which contained a reference electrode (Corning X-EL) and a KCl bridge, around which water was circulated at  $15^\circ\text{C}$  (Neslab Endocal RTE-9B). After centrifugation in heparinized capillary tubes, duplicate plasma samples were conductometrically analyzed for  $C_{\text{CO}_2}$  (Capni-con 3a; Cameron Instrument Company). Plasma  $P_{\text{CO}_2}$  and  $[\text{HCO}_3^-]$  were then calculated from pH and  $C_{\text{CO}_2}$  using values for  $\text{CO}_2$  solubility at  $15^\circ\text{C}$  taken from Heisler (1984) and for  $\text{pK}'$  (taken from Boutilier *et al.* 1984; from original data of Albers and Pleschka, 1967). Duplicate 20  $\mu\text{l}$  plasma samples were also utilized to measure  $[\text{Cl}^-]_{\text{pl}}$  by coulometric titration (Haake Buchler chloridometer).

Water  $T_{\text{amm}}$  was measured according to the methods of Solorzano (1969). Net titratable base was determined by duplicate volumetric titrations of 8ml water samples to  $\text{pH}3.800$  as described by Claiborne and Evans (1988), based on the methods of Cameron and Kormanik (1982). Combination pH electrodes (Orion Research, Inc.) were calibrated in standard  $\text{KH}_2\text{PO}_4/\text{Na}_2\text{HPO}_4$  buffers at normal concentrations or adjusted to approximate seawater  $[\text{NaCl}]$  ( $450\text{mmol l}^{-1}$ ). The titration accuracy and span of the electrode in salinities ranging from sea water to 4% sea water were tested by titrating water samples to which aliquots of acid had been added. Only electrodes which exhibited a low selectivity and response to changes in ionic strength were chosen for titratable base determinations. The net change in  $\text{HCO}_3^-$  ( $\Delta\text{HCO}_3^-$ ,  $\text{mmol kg}^{-1}$ ) was calculated as the difference between the titratable base at the beginning and end of each time interval after multiplying by the volume of the experimental bath and adjusting for the volume changes caused by water sampling and the mass of the animal.  $\Delta\text{NH}_4^+$  was determined in the same manner, from the changes in  $T_{\text{amm}}$  between periods.  $\Delta\text{H}^+$  was calculated as the difference between  $\Delta\text{NH}_4^+$  and  $\Delta\text{HCO}_3^-$  (see Claiborne and Heisler, 1986; Heisler, 1986).

In order to measure the effect of acute LSE (4% sea water) on renal output, sculpin (205–444g,  $N=9$ ) were anesthetized as above, and the opening of the urinary papilla was catheterized with PE-50 tubing. The perforated end of the catheter was pushed well within the bladder (2–4cm) before the papilla of the fish was ligated. The animals were then placed in the experimental chambers as described above. The external end of each urine catheter was placed in a pre-weighed vial attached to the outside of the darkened

box. Each vial was pre-treated with 10  $\mu\text{l}$  of streptomycin solution ( $0.25 \text{ g l}^{-1}$ ) to inhibit bacterial growth (Cala, 1977). Urine was then collected over a 12–24h seawater period, a 24h LSE, and another 12–24h period in normal sea water. At the beginning of the LSE, the chamber was closed and flushed several times, and then filled with water that had been pre-diluted to 4% sea water and equilibrated to  $15^\circ\text{C}$ . Throughout the experiment, collection vials were periodically changed and weighed and the urine was then decanted for analysis of pH,  $[\text{Na}^+]$ ,  $[\text{Cl}^-]$  and  $[\text{NH}_4^+]$ . Urine pH was measured either in a small-volume pH electrode (as above for  $\text{pH}_{\text{pl}}$ ) or in a small test tube (200–400  $\mu\text{l}$ ) with a narrow tip combination electrode and a model 901 ion analyzer (both from Orion Research).  $[\text{Na}^+]$  was analyzed using flame photometry (Instrumentation Laboratories model 943);  $[\text{Cl}^-]$  and  $T_{\text{amm}}$  were analyzed as above. To measure titratable acidity, a portion of the urine (0.5–1.0ml) was titrated with  $100 \text{ mmol l}^{-1}$  NaOH using a syringe micrometer burette (model SB2, Micro Metric Instrument Co.) to a pH of 7.80 (as modified from Cameron and Kormanik, 1982). Net ion and  $\text{H}^+$  excretion rates were calculated as the differences between individual ion concentrations (or, for  $\text{H}^+$ , titratable acidity) between each urine sample after accounting for the collection volume, time and mass of the animal.

All calculations were performed using spreadsheet software (Excel 3.0) on a Macintosh II computer (Apple Computer). Student's *t*-tests for paired or unpaired data (one- or two-tailed) were applied where appropriate. A control for overall comparison error rate in repeated-measures data was made by using the Bonferroni procedure (overall protection level, 0.05 calculated as  $\alpha/k$ ; where  $\alpha$  is the individual critical level and  $k$  is the number of comparisons; Miller, 1985). *Post-hoc* Tukey HSD tests were used to evaluate differences between experimental periods in repeated-measures data (see Figs 4, 5).

## Results

Changes in plasma  $[\text{Cl}^-]$  during exposure to sea water and to 20, 8 or 4% sea water are shown in Fig. 1.  $[\text{Cl}^-]_{\text{pl}}$  values of animals in 20% sea water were significantly lower than those of the control group at 24h (control,  $158 \pm 1 \text{ mmol l}^{-1}$ ; 20%,  $148 \pm 1.5 \text{ mmol l}^{-1}$ ; mean  $\pm$  S.E.M.) and 48h, but had returned to normal values by 72h.  $[\text{Cl}^-]_{\text{pl}}$  of fish in 8% sea water fell to  $141 \text{ mmol l}^{-1}$  by 10h and continued to drop throughout the experiment. Exposure to the lowest salinity (4% sea water) induced a rapid drop in  $[\text{Cl}^-]_{\text{pl}}$ , which fell to  $105 \pm 4 \text{ mmol l}^{-1}$  within 24h.

Plasma pH ( $\text{pH}_{\text{pl}}$ ) was somewhat variable but significantly different from control values in at least one sampling time for all three dilution groups (Fig. 2A).  $\text{pH}_{\text{pl}}$  in the 20% seawater fish was significantly above the control groups at 8h and again at 48h. At 24h,  $\text{pH}_{\text{pl}}$  in the 8% LSE group had also increased significantly, while  $\text{pH}_{\text{pl}}$  in the 4% group had fallen below controls. Plasma  $C_{\text{CO}_2}$  (Fig. 2B) also increased above control levels in both the 8% and 20% groups from 35 to 72h.

Exposure to decreased salinities induced a change in the net transfers of  $\text{NH}_4^+$  and  $\text{HCO}_3^-$  with a resulting alteration in  $\text{H}^+$  excretion (Fig. 3). In general, the greatest effect on the measured transfers was observed in animals in the lowest salinities. Fish in 4% sea water excreted  $12.9 \text{ mmol kg}^{-1}$  of  $\text{NH}_4^+$  over 44h of LSE, while  $\text{NH}_4^+$  transfers from

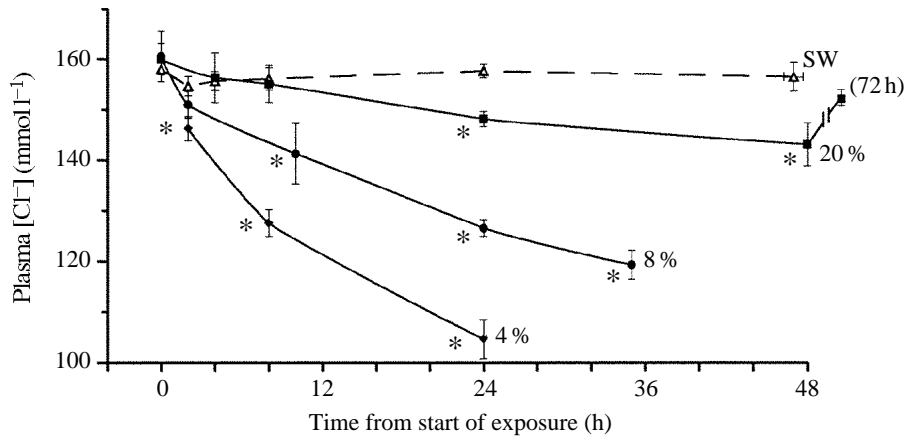

Fig. 1. The effect of decreasing external salinity on plasma  $[\text{Cl}^-]$ . Four groups of fish were exposed to sea water (SW:  $N=6$ ) and diluted sea water (20%,  $N=4$ ; 8%,  $N=4$ ; 4%,  $N=3$ ; mean  $\pm$  S.E.M.). Asterisks represent values that are significantly different from the seawater groups. The point labeled 72h represents a sample taken after 72h of exposure to 20% sea water. Horizontal error bars for the rightmost SW point represent the S.E.M. of the mean time of sample collection for that sample.

control fish amounted to only  $8.5\text{mmolkg}^{-1}$  over 46h ( $P<0.05$ ; Fig. 3A). Cumulative  $\text{HCO}_3^-$  transfer increased significantly in all groups exposed to lower salinities (Fig. 3B). At the end of 46h, control fish had lost  $3.4\text{mmolkg}^{-1}$  of  $\text{HCO}_3^-$  to the water, while the 20%, 8% and 4% groups had transferred  $7.6\text{mmolkg}^{-1}$ ,  $9.7\text{mmolkg}^{-1}$  (44h) and  $15.8\text{mmolkg}^{-1}$  (44h) respectively.  $\Delta\text{H}^+$  transfer (calculated as the difference between  $\Delta\text{NH}_4^+$  and  $\Delta\text{HCO}_3^-$ ) in the 8% and 4% LSE groups was below that observed in seawater controls. Control  $\Delta\text{H}^+$  amounted to excretion of  $5.1\text{mmolkg}^{-1}$  at the end of the 46h, whereas at 44h the 8% and 4% groups had lost 0.9 and  $-2.9\text{mmolkg}^{-1}$ , respectively (a negative  $\Delta\text{H}^+$  indicates a net gain of  $\text{H}^+$  from the water).

Figs 4 and 5 illustrate results from a group of fish in which the changes in  $\text{pH}_{\text{pl}}$ ,  $C_{\text{CO}_2}$  and acid-base transfers were measured during a 24h exposure to 4% sea water (LSE) and then a return to normal sea water.  $\text{pH}_{\text{pl}}$  (Fig. 4) varied around control values ( $7.85\pm 0.03$ ,  $N=7$ ) but decreased significantly between 8 and 24h ( $N=6$ ,  $P<0.05$ ) and then increased above the control value by the end of the recovery period ( $N=3$ ,  $P<0.05$ ). Plasma  $C_{\text{CO}_2}$  increased significantly by 24h and returned to pre-LSE levels by 46h. Plasma  $P_{\text{CO}_2}$  and  $[\text{HCO}_3^-]$  were also elevated by the end of the 24h exposure ( $P_{\text{CO}_2}$ : control,  $0.21\pm 0.01\text{kPa}$ ; 24h,  $0.38\pm 0.04\text{kPa}$ .  $[\text{HCO}_3^-]$ : control,  $5.06\pm 0.41\text{mmol l}^{-1}$ ; 24h,  $7.65\pm 0.52\text{mmol l}^{-1}$ ;  $P<0.01$ ).

LSE induced an increase in  $\text{NH}_4^+$  efflux (Fig. 5A) during the first 12h (control,  $0.19\text{mmolkg}^{-1}\text{h}^{-1}$ ; peak at 4–8h,  $0.37\text{mmolkg}^{-1}\text{h}^{-1}$ ). Likewise,  $\text{HCO}_3^-$  efflux (Fig. 5B) increased during the first 12h of the LSE period, and the peak rate of efflux was observed at 4–8h, when the animals lost  $0.34\text{mmolkg}^{-1}\text{h}^{-1}$  (control rate,  $0.09\text{mmolkg}^{-1}\text{h}^{-1}$ ). The resulting  $\text{H}^+$  efflux (Fig. 5C) effectively stopped during the

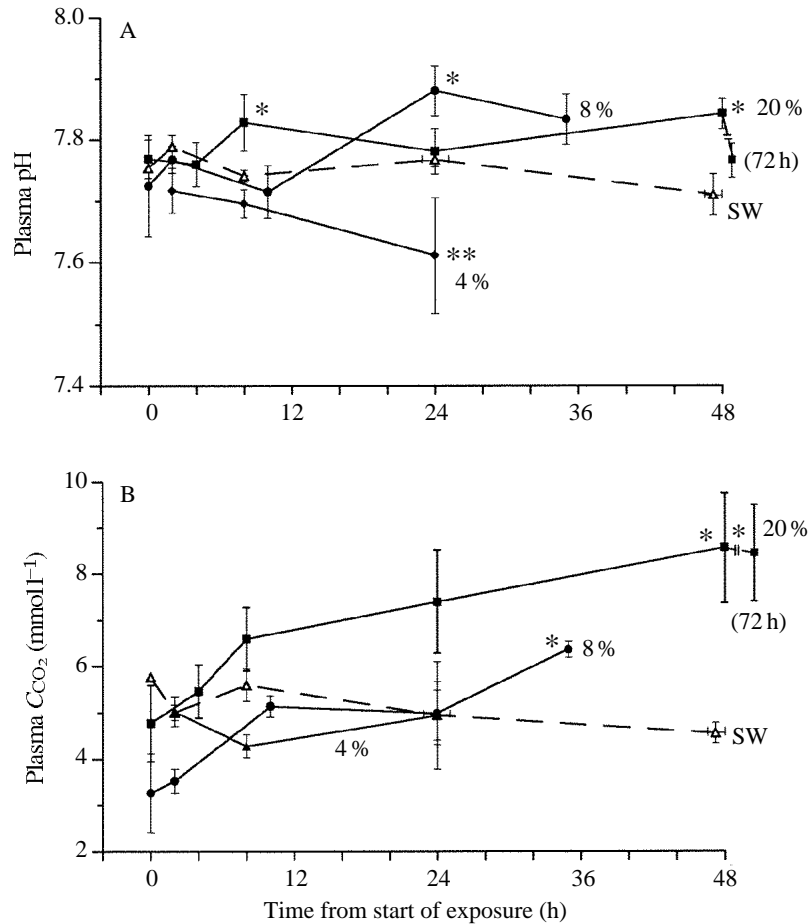

Fig. 2. The effect of decreasing external salinity on plasma pH (A) and total CO<sub>2</sub> (C<sub>CO<sub>2</sub></sub>; B). Treatment groups are the same as in Fig. 1. Values are mean  $\pm$  S.E.M. Single asterisks represent values that are significantly above seawater means; double asterisks represent values that are significantly below the value for the seawater group. For clarity, error bars for the SW and 8% groups are not shown at 24h, but are 0.54 and 0.68 mmol l<sup>-1</sup>, respectively. Horizontal error bars at 24h and 48h for SW represent the S.E.M. of the mean time of sample collection for those samples.

final 16h of LSE (compared with a control rate of 0.10 mmol kg<sup>-1</sup> h<sup>-1</sup>). When the animals were returned to normal sea water, NH<sub>4</sub><sup>+</sup> excretion again increased significantly for the first 10h, while HCO<sub>3</sub><sup>-</sup> efflux decreased to control values. These changes resulted in a significant increase in H<sup>+</sup> efflux above control values during the first 2h after the return to sea water (0.40 mmol kg<sup>-1</sup> h<sup>-1</sup>). During the first 10h following the return to sea water, average H<sup>+</sup> efflux was also 0.16 mmol kg<sup>-1</sup> h<sup>-1</sup> higher than that measured in the last 20h of LSE.

Changes in selected renal variables in response to LSE are shown in Table 1. Urine pH values ranged from 6.21 to 7.61 during the control period, and there were no significant

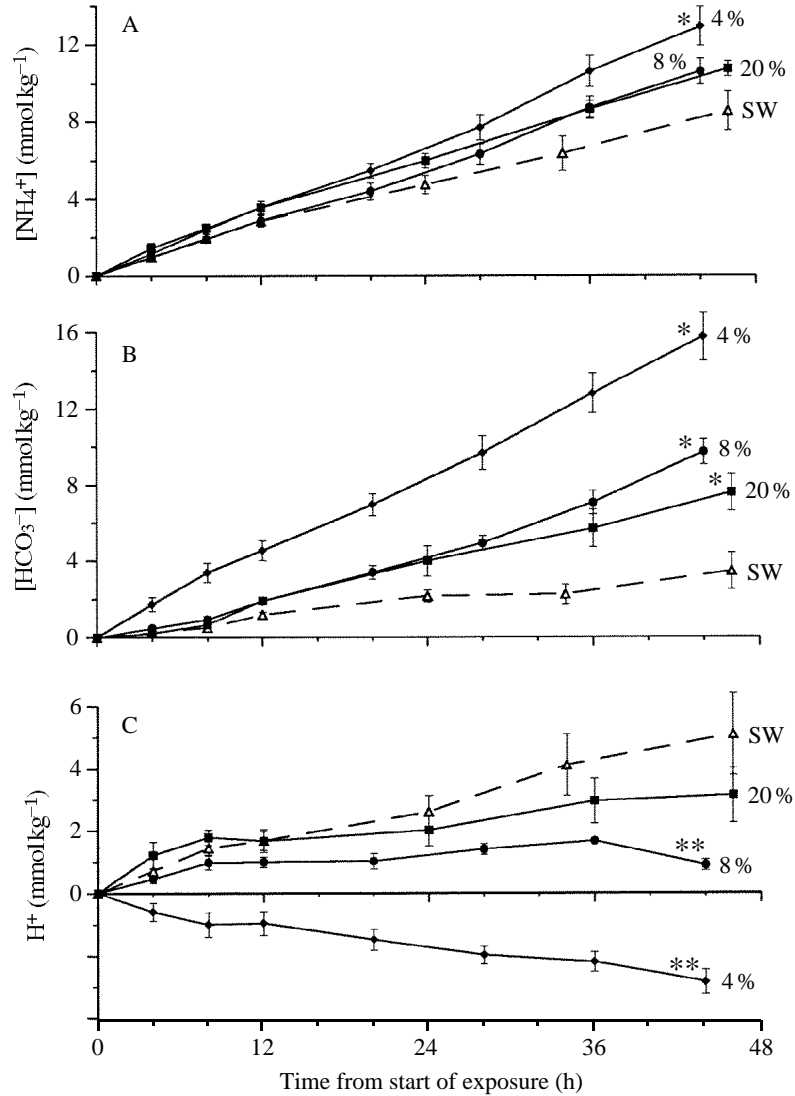

Fig. 3. Cumulative transfers of  $\text{NH}_4^+$  (A),  $\text{HCO}_3^-$  (B) and  $\text{H}^+$  (C) between the fish and the ambient water during exposure to different salinities. Positive values represent a net efflux. Fish were exposed to sea water (SW,  $N=6$  up to 24h,  $N=4$  after 24h) or diluted sea water (20%,  $N=4$ ; 8%,  $N=4$ ; 4%,  $N=6$  up to 20h,  $N=3$  after 20h). Values are mean  $\pm$  S.E.M. Asterisks represent values that are significantly above seawater means; double asterisks represent values that are significantly below the value for the seawater group.

changes induced by the LSE. Urine flow rate doubled following LSE exposure and remained elevated when the animals were returned to sea water.  $\text{Na}^+$  and  $\text{NH}_4^+$  loss also increased significantly, while net  $\text{H}^+$  and  $\text{Cl}^-$  excretion in the urine did not change significantly during or after the LSE.



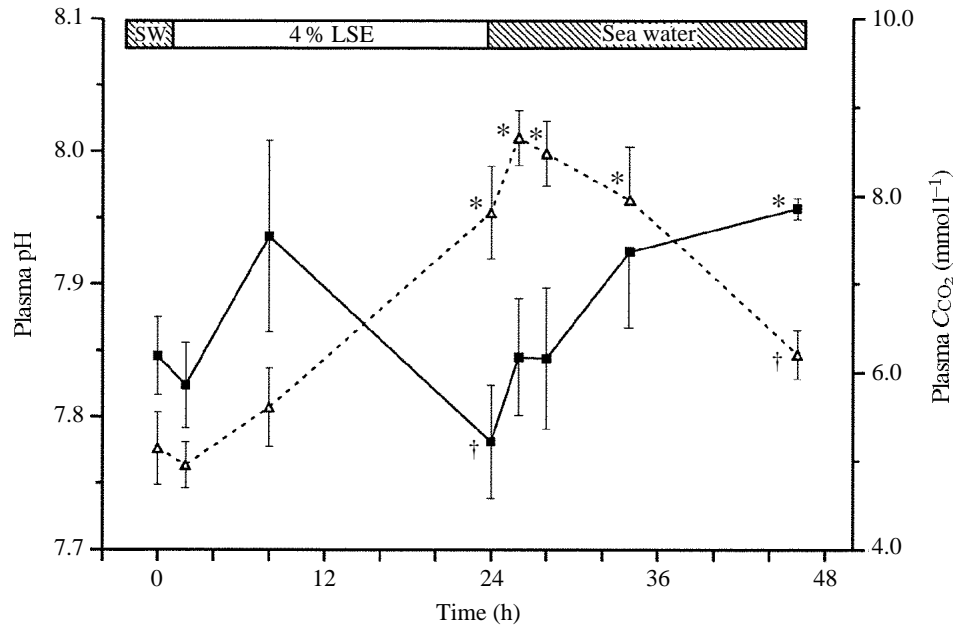

Fig. 4. Plasma pH (■) and  $C_{CO_2}$  (△) in sculpin during and after exposure to 4% sea water (4% LSE;  $N=7$  up to 8h,  $N=6$  at 24h,  $N=5$  at 26–34h,  $N=3$  at 46h). Values are mean  $\pm$  S.E.M. Asterisks indicate a significant increase from pre-exposure values. Daggers represent values that have changed significantly from the previous measurement period.

Table 1. Urine pH and flow rate and ion excretion rates in the long-horned sculpin during and after exposure to dilute salinities

|                                                                      | Seawater I          | LSE                  | Seawater II          |
|----------------------------------------------------------------------|---------------------|----------------------|----------------------|
| Urine pH                                                             | 7.18 $\pm$ 0.14 (9) | 6.93 $\pm$ 0.18 (5)  | 6.71 $\pm$ 0.18 (4)  |
| Urine flow rate (mlkg <sup>-1</sup> h <sup>-1</sup> )                | 0.26 $\pm$ 0.04 (9) | 0.58 $\pm$ 0.23 (5)* | 0.50 $\pm$ 0.12 (4)* |
| Na <sup>+</sup> ( $\mu$ molkg <sup>-1</sup> h <sup>-1</sup> )        | 18.1 $\pm$ 6.9 (9)  | 45.1 $\pm$ 20.8 (5)  | 45.6 $\pm$ 13.1 (4)* |
| Cl <sup>-</sup> ( $\mu$ molkg <sup>-1</sup> h <sup>-1</sup> )        | 19.7 $\pm$ 8.9 (6)  | 61.1 $\pm$ 27.3 (3)  | 40.2 $\pm$ 9.2 (4)   |
| H <sup>+</sup> ( $\mu$ molkg <sup>-1</sup> h <sup>-1</sup> )         | 3.4 $\pm$ 1.3 (5)   | 6.6 $\pm$ 3.4 (5)    | 5.0 $\pm$ 1.7 (4)    |
| NH <sub>4</sub> <sup>+</sup> (nmolkg <sup>-1</sup> h <sup>-1</sup> ) | 18 $\pm$ 9 (9)      | 32 $\pm$ 10 (5)      | 51 $\pm$ 17 (4)*     |

Means  $\pm$  S.E.M. ( $N$ ).

Asterisks indicate significant increases ( $P<0.05$ ) from the first seawater period. The first seawater exposure (Seawater I) was for 12–24h. This was followed by 24h of exposure to lowered salinity (4%) and a 12–24h period of recovery (Seawater II).

## Discussion

It is clear that sculpin are somewhat 'euryhaline', as they can maintain normal  $[Cl^-]_{pl}$  (Fig. 1) and  $H^+$  transfers (Fig. 3C) and survive well in 20% ambient sea water for several weeks (Claiborne *et al.* 1993; Oikari, 1980). 20% sea water (approximately 100mmol l<sup>-1</sup> NaCl) is hypo-osmotic to the plasma, but further dilutions, to 8% or 4%, induced

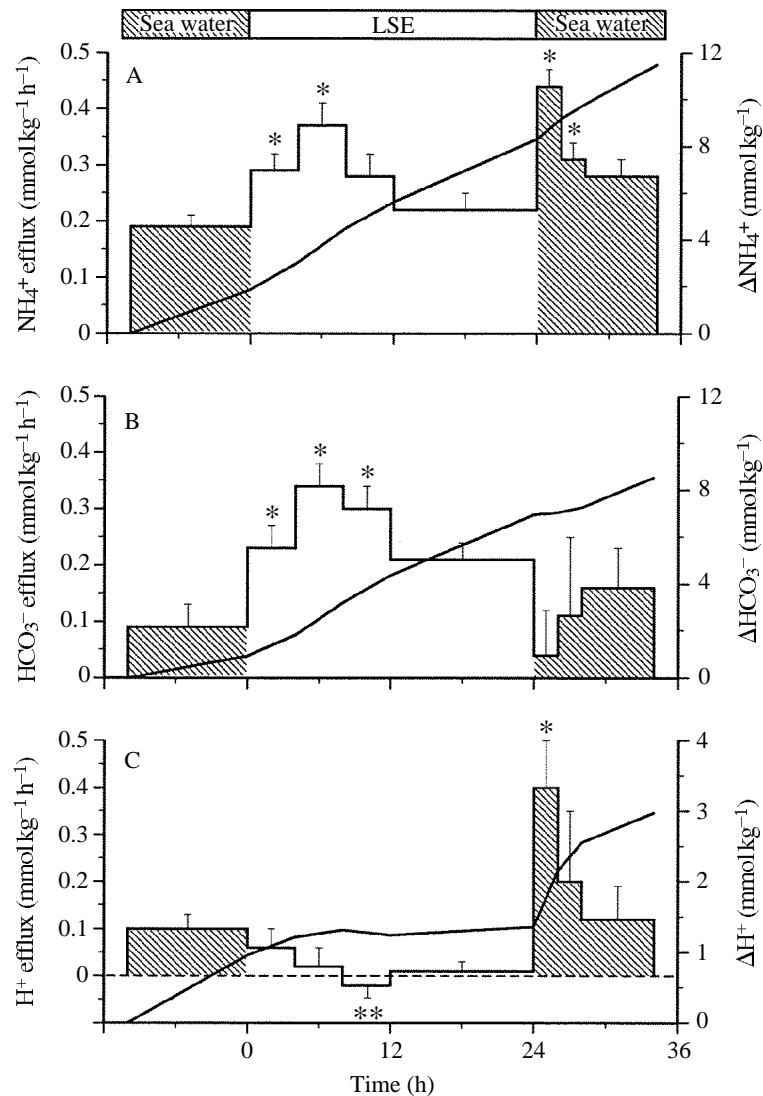

Fig. 5. Net efflux rate (histograms) and cumulative transfers (solid lines) of  $\text{NH}_4^+$  (A),  $\text{HCO}_3^-$  (B) and  $\text{H}^+$  (C) between the fish and the ambient water during and after exposure to 4% sea water (LSE). Positive values represent transfers from the animal to the water.  $N=10$ ; values are mean  $\pm$  S.E.M. Asterisks represent efflux rates that are significantly above pre-exposure means; double asterisks represent values that are significantly below the pre-exposure averages.

significant plasma ion loss and fatalities in fish exposed to these concentrations for more than 24–48h. Plasma pH increased significantly in the 20% and 8% groups but, because of an increase in plasma  $P_{\text{CO}_2}$ , decreased in fish exposed to the most dilute sea water tested (Fig. 2A). The 20% and 8% groups exhibited an approximately twofold increase

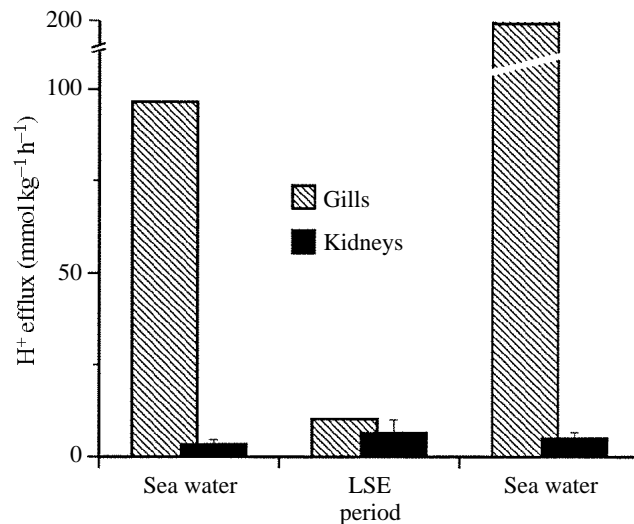

Fig. 6. Partitioning of H<sup>+</sup> efflux between urine and gills during and after exposure to 4% sea water (LSE). Gill rates are calculated as the difference between 'whole-body' rates (Fig. 5) and urine H<sup>+</sup> output measured in a separate group of fish ( $N=5$ ).

in plasma  $CCO_2$  (Fig. 2B), and this was presumably responsible for the observed elevations in pH. Thus, LSE induced variable changes in internal acid–base status, with plasma pH varying by approximately 0.1 unit from control values and  $CCO_2$  increasing in two of the three dilution groups.

As shown previously (Claiborne and Evans, 1988), sculpin exhibit a slight positive excretion of H<sup>+</sup> under control conditions. In the present study, control  $\Delta NH_4^+$  was approximately 2.5-fold higher than  $\Delta HCO_3^-$ , resulting in a net H<sup>+</sup> excretion of  $0.11 \text{ mmol kg}^{-1} \text{ h}^{-1}$  over the 46h period (Fig. 3). These transfers were disrupted during the LSE. Ammonia excretion increased by approximately 50% in animals exposed to 4% sea water (or to elevated external ammonia; see Claiborne and Evans, 1988).  $\Delta HCO_3^-$  excretion increased progressively in all three LSE groups, with the 4% animals exhibiting an approximately 4.5-fold increase in total  $HCO_3^-$  loss. These predominant changes in  $\Delta HCO_3^-$  resulted in a significant decrease in  $\Delta H^+$  in the 8% group between 36 and 44h, and a reversal to a negative  $\Delta H^+$  (an uptake of H<sup>+</sup>) in the 4% animals from the start. The net  $\Delta H^+$  'gain' (the difference between cumulative H<sup>+</sup> transferred in the seawater and each experimental group at the end of the experiment) was quite large; amounting to 4.2 and  $8.0 \text{ mmol kg}^{-1}$  over the 44h period (in the 8% and 4% groups, respectively). This amount was similar in magnitude to the acid load generated by the spotted dogfish (*Scyliorhinus stellaris*) during strenuous exercise (Holeton and Heisler, 1983) and clearly caused an acid–base imbalance in the sculpin.

To define the effects of exposure to very dilute water and subsequent recovery, a second group of animals was exposed to 4% sea water for 24h and then returned to normal sea water (Figs 4 and 5). Acute exposure to this extreme dilution again altered

plasma acid–base values and fish-to-water ion transfers, but the animals were able to recover when returned to normal sea water.  $\text{pH}_{\text{pl}}$  remained near pre-LSE values, but plasma  $C_{\text{CO}_2}$  increased by 52% during the LSE, then returned towards control values during the seawater recovery period. This plasma  $C_{\text{CO}_2}$  increase was similar to that observed in the flounder (*Platichthys flesus*) 24h after transferring the animal from sea water to fresh water (Nonnotte and Truchot, 1990). These authors attributed the increase in plasma  $[\text{HCO}_3^-]$  and  $P_{\text{CO}_2}$  to hypercapnia resulting from hypoventilation during the freshwater exposure. This may also be the case in the present study as both plasma  $P_{\text{CO}_2}$  and  $[\text{HCO}_3^-]$  increased (from 0.21 to 0.38kPa and from 5.06 to 7.66mmol l<sup>-1</sup>, respectively) during the LSE. It is especially interesting that  $\text{pH}_{\text{pl}}$  remained relatively constant during the LSE whereas  $C_{\text{CO}_2}$  increased concurrently with the large net  $\text{HCO}_3^-$  loss (Fig. 5B).  $\Delta\text{H}^+$  was near zero from 8h to 24h even though plasma  $[\text{HCO}_3^-]$  continued to increase during this period. Upon return to sea water, an elevation in  $\Delta\text{NH}_4^+$  and a decrease in  $\Delta\text{HCO}_3^-$  during the first few hours increased  $\Delta\text{H}^+$  once again. These changes resulted in a net  $\text{H}^+$  gain to the animal of 1.9mmol kg<sup>-1</sup> by the end of the LSE and a net loss of 0.94mmol kg<sup>-1</sup> during the subsequent seawater period. Thus, approximately 50% of the net  $\text{H}^+$  gained during the LSE was excreted in the first 10h in sea water. Given that the  $\text{H}^+$  gain was equivalent to a  $\text{HCO}_3^-$  loss, then if the 1.9mmol kg<sup>-1</sup> of  $\text{HCO}_3^-$  lost to the water during the LSE originated entirely from the extracellular space, plasma  $[\text{HCO}_3^-]$  would have been expected to decrease by more than 9mmol l<sup>-1</sup> (using an extracellular space estimate of 20%; Cameron, 1980). This value is quite implausible, considering that the control plasma  $C_{\text{CO}_2}$  was approximately 5mmol l<sup>-1</sup>. Indeed, plasma  $C_{\text{CO}_2}$  increased by 2.7mmol l<sup>-1</sup> during the LSE and, when combined with the measured  $\text{HCO}_3^-$  loss to the water during this period, amounted to 2.4mmol kg<sup>-1</sup> of base equivalents (the sum of the 1.9mmol kg<sup>-1</sup> loss and 0.2 times the 2.7mmol l<sup>-1</sup> plasma  $[\text{HCO}_3^-]$  increase) moving from an intracellular compartment into the plasma.

It would seem likely that the base loss originated from the muscle, since red and white muscle have been shown to contribute to intracellular buffering during acid–base disturbances under a number of conditions in several species (Heisler *et al.* 1976, 1982; Cameron and Kormanik, 1982; Claiborne and Heisler, 1986; Wright *et al.* 1988; for a review see Heisler, 1993). Surprisingly, preliminary evidence indicates that intracellular muscle pH in the sculpin does not change during 23h of 4% LSE. Intracellular pH of white muscle in both control and LSE fish was approximately 7.3, whereas  $\text{pH}_i$  in moderately exercised fish was approximately 6.8 (J. B. Claiborne and L. Barber, unpublished observations, using the methods of Pörtner *et al.* 1991). This suggests another origin for the base that was lost to the water. Bone resorption and  $\text{Ca}^{2+}$  efflux are known to increase during acidosis in mice (Bushinsky *et al.* 1993). Acidosis-induced physiochemical bone dissolution also results in similar amounts of  $\text{Na}^+$  release (Bushinsky *et al.* 1992). Presumably the loss of  $\text{Ca}^{2+}$  and  $\text{Na}^+$  from the bone is accompanied by the transfer of phosphate and carbonates. In contrast, Cameron (1985) showed that  $\text{Ca}^{2+}$  and  $\text{PO}_4^{3-}$  were the two major mineral salts in the bone of catfish, but that carbonate mobilization from bone did not act as a source of acid compensation during hypercapnia in that species. It is interesting that, in the sculpin during 24h of 4%

seawater LSE, plasma  $[\text{PO}_4^{3-}]$  increased and a significant fraction of intracellular  $\text{Ca}^{2+}$  was released to the water (Claiborne *et al.* 1990). It remains to be seen whether demineralization of the bone compartment acts as a source of base during LSE in the sculpin.

Urine flow rate doubled following LSE exposure, remained elevated when the animals were returned to sea water and was always within the range measured in other benthic species (Table 1; Shannon, 1938). The variation in urine pH of control animals contrasts with early work on this and other species (Brull *et al.* 1953; Hodler *et al.* 1955; Fanelli and Nigrelli, 1963), which indicated that marine teleosts have a ‘fixed’ acidic pH (approximately 6.0). Our data (here and in Compton-McCullough *et al.* 1989) agree with the recent study of Maren *et al.* (1992), which demonstrated a variable urine pH in sculpin following acid–base disturbances such as base infusion or imidazole injection.  $\text{Na}^+$  and  $\text{NH}_4^+$  losses also increased significantly during the LSE but, along with  $\text{Cl}^-$  excretion, these losses amounted to less than 1% of the measured ‘whole-body’ (branchial) transfers for these ions (e.g. renal  $\text{Na}^+$  efflux, approximately  $18 \mu\text{molkg}^{-1} \text{h}^{-1}$  versus a total  $\text{Na}^+$  efflux of approximately  $15 \text{mmolkg}^{-1} \text{h}^{-1}$ ; Claiborne and Evans, 1981). These data are not surprising considering the negligible role for monovalent ion transport by the kidneys of marine teleosts (Hickman and Trump, 1969).

Net whole-body  $\text{H}^+$  excretion (Fig. 5C) in the seawater sculpin was approximately  $100 \mu\text{molkg}^{-1} \text{h}^{-1}$  and decreased to approximately  $17 \mu\text{molkg}^{-1} \text{h}^{-1}$  when fish were subjected to 4% LSE for 24h. Net  $\text{H}^+$  excretion in the urine measured under the same two conditions was 3.4 and  $6.6 \mu\text{molkg}^{-1} \text{h}^{-1}$ , respectively (Table 1, Fig. 6). Thus, renal  $\text{H}^+$  loss during exposure to sea water made up only 3% of the measured whole-body  $\text{H}^+$  excretion. In contrast, during the LSE, nearly 40% of the total measured ‘whole-body’  $\Delta\text{H}^+$  was actually due to the continued renal  $\text{H}^+$  efflux. Thus, the contribution of the kidney to pH regulation in these animals during the LSE is similar to that reported in freshwater species (McDonald and Wood, 1981; Cameron and Kormanik, 1982; Hobe *et al.* 1983). Nonetheless, the direct effect of LSE is on the branchial transfers of  $\text{H}^+$ , and the assistance provided by the kidney is not sufficient to ameliorate the acid–base imbalance (Fig. 6).

The decrease and then reversal of  $\Delta\text{H}^+$  across the gills during the LSE (Figs 3C, 5C) could have been driven by a number of mechanisms. Loss of intracellular  $\text{HCO}_3^-$  into the blood and then into the water by passive diffusion down its electrochemical gradient was possible, for the external water  $\text{C}_{\text{CO}_2}$  decreased during the LSE (from approximately 2.0 to  $0.2 \text{mmol l}^{-1}$ ; J. B. Claiborne, unpublished observation) and the transepithelial potential of the sculpin becomes serosa-negative during the LSE (sea water, +22mV; 20% sea water,  $-10 \text{mmol l}^{-1}$ ; 4% sea water,  $-39 \text{mV}$ ; Walton, 1991). However, the gradient is also outwardly directed when the animals are in 20% sea water, and they are able to maintain near normal  $\Delta\text{H}^+$  in this salinity. In addition, sculpin exposed to 4% sea water containing  $5 \text{mmol l}^{-1} \text{NaHCO}_3$  exhibited changes in  $\Delta\text{H}^+$  that were similar to those measured during LSE here (Walton, 1991). An elevation of external  $[\text{Ca}^{2+}]$  to seawater levels ( $10 \text{mmol l}^{-1}$ ) during the LSE (which should decrease gill permeability; Carrier and Evans, 1976; for a review, see Evans, 1984) also had no effect on  $\text{HCO}_3^-$  loss to the water (Walton, 1991). Ammonia lost by the animal under the normal conditions of

a fish-to-water partial pressure gradient is thought to be mainly through the passive diffusion of  $\text{NH}_3$  across the gills (Cameron and Heisler, 1983; Claiborne and Evans, 1988; Wright *et al.* 1988). If the changes in  $\Delta\text{NH}_4^+$  measured here were due to differences in  $\text{NH}_3$  (rather than  $\text{NH}_4^+$ ) production and loss, then the observed  $\Delta\text{H}^+$  was driven by the net movements of  $\text{H}^+$  and/or  $\text{HCO}_3^-$  ( $\text{OH}^-$ ) between the fish and the water (predominantly across the gills; see above). When the animal was transferred to lower salinities, less external NaCl would be available for branchial exchange through  $\text{Na}^+/\text{H}^+$  or  $\text{Cl}^-/\text{HCO}_3^-$  mechanisms (Iwama and Heisler, 1991; Goss and Wood, 1991), but any electrogenic excretion of  $\text{H}^+$  (Lin and Randall, 1991) would not be directly affected. It remains to be seen what the individual effect(s) of decreasing external  $[\text{Na}^+]$  and/or  $[\text{Cl}^-]$  are on the net acid excretion, but this might shed more light on the transbranchial processes involved. It is interesting to note that the euryhaline toadfish *Opsanus tau* also lost  $\text{HCO}_3^-$  to the water in net amounts similar to those measured in the present study when it was subjected to the same LSE but, after several days in the lowered salinity, its net excretion of  $\text{H}^+$  had returned to seawater rates (J. B. Claiborne, unpublished results; Walton, 1991; Compton-McCullough, 1993). That an increase in  $\Delta\text{HCO}_3^-$  of similar magnitude occurred in this truly euryhaline species (with no obvious deleterious effects to the fish) may imply that these transfers are employed to cope with the dilution stress. If the  $\text{HCO}_3^-$  lost to the water is a purely passive effect of the LSE, then perhaps it is the inability of the sculpin to alter the rate of  $\text{HCO}_3^-$  efflux (by modification of gill ion-exchange systems or a reduction in overall branchial permeability) that limits this species' survival in very dilute brackish and fresh water.

In conclusion, we have investigated the regulation of extracellular acid-base variables and transfers between the fish and the water when marine sculpin are exposed to sea water or 20%, 8% or 4% sea water for 24–48h. Sculpin were partially euryhaline: they maintained plasma ion and acid-base transfers in hypo-osmotic (20%) sea water, but could not tolerate greater dilutions for more than several days. Plasma pH and  $C_{\text{CO}_2}$  increased in the 20% and 8% dilution groups because of an increase in plasma  $P_{\text{CO}_2}$  and  $[\text{HCO}_3^-]$  (perhaps caused by a mobilization of base from the intracellular bone compartment).  $\Delta\text{HCO}_3^-$  increased progressively in the 8% and 4% groups, and those animals lost  $\text{H}^+$  at lower rates than did seawater fish. Animals that were exposed to 4% sea water for 24h and then returned to normal sea water had a variable plasma pH, elevated  $C_{\text{CO}_2}$  and a near zero net efflux of  $\text{H}^+$  during the low-salinity period. Renal acid excretion remained unchanged and made up approximately 40% of the total acid transfers during the 4% dilution period but was only 3% of the branchial rate in sea water. Dilution of the ambient water could induce base loss by alteration of gill ion exchanges ( $\text{Na}^+/\text{H}^+$ ,  $\text{Cl}^-/\text{HCO}_3^-$ ) and/or changes in branchial  $\text{HCO}_3^-$  permeability. The effects of reduced salinities on acid-base transfers may therefore be additional evolutionary and environmental factors that restrict euryhalinity in some species of marine fish.

The authors wish to thank Drs David H. Evans, Thomas Maren and Steven Vives for helpful discussions concerning this work. Funded by NSF PCM 86-02905, Georgia Southern Faculty Research Grants and Hearst Foundation Fellowship support to J.B.C.

## References

- ALBERS, C. AND PLESCHKA, K. (1967). Effect of temperature on CO<sub>2</sub> transport in elasmobranch blood. *Respir. Physiol.* **2**, 261–273.
- BATH, R. N. AND EDDY, F. B. (1979). Ionic and respiratory regulation in rainbow trout during rapid transfer to sea water. *J. comp. Physiol.* **134**, 351–357.
- BOUTILIER, R. G., HEMING, T. A. AND IWAMA, G. A. (1984). Physicochemical parameters for use in fish respiratory physiology. In *Fish Physiology* (ed. W. S. Hoar and D. J. Randall), pp. 403–430. New York: Academic Press.
- BRULL, L., NIZET, E. AND VERNEY, E. B. (1953). Blood and urine constituents of *Lophius piscatorius* L. *J. Mar. biol. Assc.U.K.* **32**, 329–336.
- BUSHINSKY, D. A., SESSLER, N. E. AND KRIEGER, N. S. (1992). Greater unidirectional calcium efflux from bone during metabolic, compared with respiratory, acidosis. *Am. J. Physiol.* **262**, F425–F431.
- BUSHINSKY, D. A., WOLBACH, W., SESSLER, N. E., MOGILEVSKY, R. AND LEVSETTI, R. (1993). Physicochemical effects of acidosis on bone calcium flux and surface ion composition. *J. Bone Min. Res.* **8**, 93–102.
- CALA, P. M. (1977). Volume regulation by flounder red blood cells in anisotonic media. *J. gen. Physiol.* **69**, 537–552.
- CAMERON, J. N. (1976). Branchial ion uptake in arctic grayling: resting values and effects of acid–base disturbances. *J. exp. Biol.* **64**, 711–725.
- CAMERON, J. N. (1980). Body fluid pools, kidney function and acid–base regulation in fresh water catfish *Ictalurus punctatus*. *J. exp. Biol.* **86**, 171–185.
- CAMERON, J. N. (1985). The bone compartment in a teleost fish, *Ictalurus punctatus*: size, composition and acid–base response to hypercapnia. *J. exp. Biol.* **117**, 307–318.
- CAMERON, J. N. AND HEISLER, N. (1983). Studies of ammonia in the rainbow trout: physio-chemical parameters, acid–base behaviour and respiratory clearance. *J. exp. Biol.* **105**, 107–125.
- CAMERON, J. N. AND KORMANIK, G. N. (1982). The acid–base responses of gills and kidney to infused acid and base loads in the channel catfish, *Ictalurus punctatus*. *J. exp. Biol.* **99**, 143–160.
- CARRIER, J. C. AND EVANS, D. H. (1976). The role of environmental calcium in freshwater survival of the marine teleost, *Lagodon rhomboides*. *J. exp. Biol.* **65**, 529–538.
- CLAIBORNE, J. B., COMPTON-MCCULLOUGH, D., WALTON, J. S. AND BARBER, L. M. (1990). Plasma ion and acid–base regulation in the long horned sculpin (*Myoxocephalus octodecimspinosus*) during exposure to low salinities. *Bull. Mt Desert Island Biol. Lab.* **29**, 60–61.
- CLAIBORNE, J. B. AND EVANS, D. H. (1981). The effect of perfusion and irrigation flow rate variations on NaCl efflux from the isolated, perfused head of the marine teleost, *Myoxocephalus octodecimspinosus*. *Mar. Biol. Lett.* **2**, 123–130.
- CLAIBORNE, J. B. AND EVANS, D. H. (1988). Ammonia and acid–base balance during high ammonia exposure in a marine teleost (*Myoxocephalus octodecimspinosus*). *J. exp. Biol.* **140**, 89–105.
- CLAIBORNE, J. B., EVANS, D. H. AND GOLDSTEIN, L. (1982). Fish branchial Na<sup>+</sup>/NH<sub>4</sub><sup>+</sup> exchange is via basolateral Na<sup>+</sup>–K<sup>+</sup> activated ATPase. *J. exp. Biol.* **96**, 431–434.
- CLAIBORNE, J. B. AND HEISLER, N. (1984). Acid–base regulation and ion transfers in the carp (*Cyprinus carpio*) during and after exposure to environmental hypercapnia. *J. exp. Biol.* **108**, 25–43.
- CLAIBORNE, J. B. AND HEISLER, N. (1986). Acid–base regulation and ion transfers in the carp (*Cyprinus carpio*): pH compensation during graded long- and short-term environmental hypercapnia and the effect of bicarbonate infusion. *J. exp. Biol.* **126**, 41–61.
- CLAIBORNE, J. B., PERRY, E. AND BELLOWES, S. (1993). Acid–base transfers in the long-horned sculpin (*Myoxocephalus octodecimspinosus*) following acid infusion: effect of low external sodium. *Bull. Mt Desert Island Biol. Lab.* **32**, 95–97.
- COMPTON-MCCULLOUGH, D. (1993). Acid–base regulation in three marine teleosts: the oyster toadfish (*Opsanus tau*), the winter flounder (*Pseudopleuronectes americanus*) and the long-horned sculpin (*Myoxocephalus octodecimspinosus*). Unpublished Masters thesis. Georgia Southern University, Statesboro, USA.
- COMPTON-MCCULLOUGH, D., WALTON, J. AND CLAIBORNE, J. B. (1989). The role of the kidney in acid–base regulation in the long-horned sculpin (*Myoxocephalus octodecimspinosus*) during exposure to low salinities. *Bull. Mt Desert Island Biol. Lab.* **28**, 44–45.
- EDDY, F. B., LOMHOLT, J. P., WEBER, R. E. AND JOHANSEN, K. (1977). Blood respiratory properties of rainbow trout (*Salmo gairdneri*) kept in water of high CO<sub>2</sub> tension. *J. exp. Biol.* **67**, 37–47.

- EVANS, D. H. (1977). Further evidence for  $\text{Na}^+/\text{NH}_4^+$  exchange in marine teleost fish. *J. exp. Biol.* **70**, 213–220.
- EVANS, D. H. (1980). Osmotic and ionic regulation by freshwater and marine fishes. In *Environmental Physiology of Fishes* (ed. M. A. Ali), pp. 93–122. New York: Plenum Press.
- EVANS, D. H. (1982). Mechanisms of acid extrusion by two marine fishes: the teleost, *Opsanus beta* and the elasmobranch, *Squalus acanthias*. *J. exp. Biol.* **97**, 289–299.
- EVANS, D. H. (1984). The roles of gill permeability and transport mechanisms in euryhalinity. In *Fish Physiology* (ed. W. S. Hoar and D. J. Randall), pp. 239–283. New York: Academic Press.
- EVANS, D. H. (1993). Osmotic and Ionic Regulation. In *The Physiology of Fishes* (ed. D. H. Evans), pp. 315–341. Boca Raton: CRC Press.
- FANELLI, G. M. J. AND NIGRELLI, R. F. (1963). Renal excretion of tetracycline in the agglomerular toadfish, *Opsanus tau*. *Proc. Soc. exp. Biol. Med.* **114**, 582.
- GOSS, G. G. AND WOOD, C. M. (1991). Two-substrate kinetic analysis: a novel approach linking ion and acid–base transport at the gills of freshwater trout, *Oncorhynchus mykiss*. *J. comp. Physiol.* **161**, 635–646.
- HEISLER, N. (1982). Transepithelial ion transfer processes as mechanisms for fish acid–base regulation in hypercapnia and lactacidosis. *Can. J. Physiol.* **60**, 1108–1122.
- HEISLER, N. (1984). Acid–base regulation in fishes. In *Fish Physiology* (ed. W. S. Hoar and D. J. Randall), pp. 315–401. New York: Academic Press.
- HEISLER, N. (1986). Comparative aspects of acid–base regulation. In *Acid–Base Regulation in Animals* (ed. N. Heisler), pp. 397–450. Amsterdam: Elsevier.
- HEISLER, N. (1993). Acid–base regulation. In *The Physiology of Fishes* (ed. D. H. Evans), pp. 343–378. Boca Raton: CRC Press.
- HEISLER, N., FORCHT, G., ULTSCH, G. R. AND ANDERSON, J. F. (1982). Acid–base regulation in response to environmental hypercapnia in two aquatic salamanders, *Siren lacertina* and *Amphiuma means*. *Respir. Physiol.* **49**, 141–158.
- HEISLER, N., WEITZ, H. AND WEITZ, A. M. (1976). Hypercapnia and resultant bicarbonate transfer processes in an elasmobranch fish (*Scyliorhinus stellaris*). *Bull. europ. Physiopathol. Respir.* **12**, 77–85.
- HICKMAN, C. P. AND TRUMP, B. F. (1969). The kidney. In *Fish Physiology* (ed. W. S. Hoar and D. J. Randall), pp. 91–239. New York: Academic Press.
- HOBE, H., WILKES, P. R. H., WALKER, R. L. AND MCMAHON, B. R. (1983). Acid–base balance, ionic status and renal function in resting and acid-exposed white suckers (*Catostomus commersoni*). *Can. J. Zool.* **61**, 2660–2668.
- HODLER, J., HEINEMANN, O., FISHMAN, A. P. AND SMITH, H. W. (1955). Urine pH and carbonic anhydrase activity in the marine dogfish. *Am. J. Physiol.* **183**, 155–162.
- HOLETON, G. F. AND HEISLER, N. (1983). Contribution of net ion transfer mechanisms to the acid–base regulation after exhausting activity in the larger spotted dogfish (*Scyliorhinus stellaris*). *J. exp. Biol.* **103**, 31–46.
- ISAIA, J., PAYAN, P. AND GIRARD, J. P. (1979). A study of the water permeability of the gills of freshwater- and seawater-adapted trout (*Salmo gairdneri*): mode of action of epinephrine. *Physiol. Zool.* **52**, 269–279.
- IWAMA, G. K. AND HEISLER, N. (1991). Effect of environmental water salinity on acid–base regulation during environmental hypercapnia in the rainbow trout (*Oncorhynchus mykiss*). *J. exp. Biol.* **158**, 1–18.
- JANSSEN, R. G. AND RANDALL, D. L. (1975). The effect of changes in pH and  $P_{\text{CO}_2}$  in blood and water on breathing in rainbow trout, *Salmo gairdneri*. *Respir. Physiol.* **25**, 235–245.
- LAHLOU, B., HENDERSON, I. W. AND SAWYER, W. H. (1969). Renal adaptations by *Opsanus tau*, a euryhaline agglomerular teleost, to dilute media. *Am. J. Physiol.* **216**, 1266–1272.
- LAHLOU, B. AND SAWYER, W. H. (1969). Sodium exchanges in the toadfish, *Opsanus tau*, a euryhaline agglomerular teleost. *Am. J. Physiol.* **216**, 1273–1278.
- LIN, H. AND RANDALL, D. J. (1991). Evidence for the presence of an electrogenic proton pump on the trout gill epithelium. *J. exp. Biol.* **161**, 119–134.
- LORETZ, C. A. AND BERN, H. A. (1982). Prolactin and osmoregulation in vertebrates. *Neuroendocr.* **35**, 292–304.
- MAETZ, J. AND GARCIA-ROMEY, F. (1964). The mechanism of sodium and chloride uptake by the gills of



- a freshwater fish *Carassius auratus*. Evidence for  $\text{NH}_4^+/\text{Na}^+$  and  $\text{HCO}_3^-/\text{Cl}^-$  exchange. *J. gen. Physiol.* **47**, 1209–1226.
- MAREN, T. H., FINE, A., SWENSON, E. R. AND ROTHMAN, D. (1992). Renal acid–base physiology in marine teleost, the long-horned sculpin (*Myoxocephalus octodecimspinosus*). *Am. J. Physiol.* **263**, 49–55.
- MAXIME, V., PEYRAUD-WAITZENEGGAR, M. AND CLAIREAUX, G. (1990). Effects of rapid transfer from sea water to fresh water on respiratory variables, blood acid–base status and  $\text{O}_2$  affinity of haemoglobin in Atlantic salmon (*Salmo salar* L.). *J. comp. Physiol.* **160**, 31–40.
- MCDONALD, D. G., WALKER, R. L., WILKES, P. R. H. AND WOOD, C. M. (1982).  $\text{H}^+$  excretion in the marine teleost *Parophrys vetulus*. *J. exp. Biol.* **98**, 403–414.
- MCDONALD, D. G. AND WOOD, C. M. (1981). Branchial and renal acid and ion fluxes in the rainbow trout, *Salmo gairdneri*, at low environmental pH. *J. exp. Biol.* **93**, 101–118.
- MILLER, R. (1985). Multiple Comparisons. In *Encyclopedia of Statistical Sciences* (ed. S. Kotz and N. L. Johnson), pp. 679–689. New York: John Wiley and Sons.
- MILNE, R. S. AND RANDALL, D. J. (1976). Regulation of arterial pH during fresh water to seawater transfer in the rainbow trout *Salmo gairdneri*. *Comp. Biochem. Physiol.* **53**, 157–160.
- NONNOTTE, G. AND TRUCHOT, J. P. (1990). Time-course of extracellular acid–base adjustments under hypo- or hyperosmotic conditions in the euryhaline fish, *Platichthys flesus*. *J. Fish Biol.* **98**, 403–414.
- OIKARI, A. (1980). The effects of brackish water on urinary excretion of ions in the marine sculpins *Myoxocephalus scorpius* (L.) and *Myoxocephalus octodecimspinosus* (Mitchill). *Bull. Mt Desert Island Biol. Lab.* **20**, 57–60.
- PERRY, S. F. AND HEMING, T. A. (1981). Blood ionic and acid–base status in rainbow trout (*Salmo gairdneri*) following rapid transfer from freshwater to sea water: effect of pseudobranch denervation. *Can. J. Zool.* **59**, 1126–1132.
- PÖRTNER, H. O., WEBBER, D. M., BOUTILIER, R. G. AND ODOR, R. K. (1991). Acid–base regulation in exercising squid (*Illex illecebrosus*, *Loligo pealei*). *Am. J. Physiol.* **261**, R239–R246.
- SHANNON, J. A. (1938). The renal excretion of phenol red by the aglomerular toadfish, *Opsanus tau* and *Lophius piscatorius*. *J. cell. comp. Physiol.* **11**, 315–323.
- SILVA, P., SOLOMON, R., SPOKES, K. AND EPSTEIN, F. H. (1977). Ouabain inhibition of gill  $\text{Na}^+/\text{K}^+$ -ATPase: relationship to active chloride transport. *J. exp. Zool.* **199**, 419–427.
- SOLORZANO, L. (1969). Determination of ammonia in natural waters by the phenolhypochlorite method. *Limnol. Oceanogr.* **14**, 799–801.
- SULLIVAN, L. P. (1986). Renal mechanisms involved in acid–base regulation. In *Acid-Base Regulation in Animals* (ed. N. Heisler), pp. 83–137. Amsterdam: Elsevier.
- TANG, Y., MCDONALD, D. G. AND BOUTILIER, R. G. (1989). Acid–base regulation following exhaustive exercise: a comparison between freshwater- and seawater-adapted rainbow trout (*Salmo gairdneri*). *J. exp. Biol.* **141**, 407–418.
- WALTON, J. S. (1991). Acid–base regulation in two marine teleosts: the stenohaline long-horned sculpin (*Myoxocephalus octodecimspinosus*) and the euryhaline toadfish (*Opsanus tau*) during exposure to low environmental salinities. Unpublished Masters thesis. Georgia Southern University, Statesboro, USA.
- WHEATLY, M. G., HOBE, H. AND WOOD, C. M. (1984). The mechanisms of acid–base and ionoregulation in the freshwater rainbow trout during environmental hyperoxia and subsequent normoxia. II. The role of the kidney. *Respir. Physiol.* **55**, 155–173.
- WOOD, C. M., WHEATLY, M. G. AND HOBE, H. (1984). The mechanisms of acid–base and ionoregulation in the freshwater rainbow trout during environmental hyperoxia and subsequent normoxia. III. Branchial exchanges. *Respir. Physiol.* **55**, 175–192.
- WRIGHT, P. A., RANDALL, D. J. AND WOOD, C. M. (1988). The distribution of ammonia and  $\text{H}^+$  between tissue compartments in lemon sole (*Parophrys vetulus*) at rest, during hypercapnia and following exercise. *J. exp. Biol.* **136**, 149–175.
- ZADUNAISKY, J. A. (1984). The chloride cell: the active transport of chloride and the paracellular pathways. In *Fish Physiology* (ed. W. S. Hoar and D. J. Randall), pp. 129–176. New York: Academic Press.
